# Supplementary material for: Understanding the implementation and effectiveness of a group-based early parenting intervention: a process evaluation protocol
Source: PubMed Central journal article supplement (PMC5025622; doi:10.1186/s12913-016-1737-3), 2016-09-15
Supplement: 12913_2016_1737_MOESM3_ESM.pdf [file 12913_2016_1737_MOESM3_ESM.pdf]

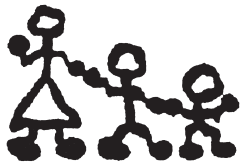

**Incredible Years®**  
**Parent Program Satisfaction Questionnaire**  
**Toddlers Program**

(Hand out at end of the program)

Participant's Name \_\_\_\_\_ Date \_\_\_\_\_

The following questionnaire is part of our evaluation of the Incredible Years parenting program that you have received. It is important that you answer as honestly as possible. The information obtained will help us to evaluate and continually improve the program we offer. Your cooperation is greatly appreciated. All responses will be strictly confidential.

**A. The Overall Program**

Please circle the response that best expresses how you honestly feel at this point.

1. The bonding that I feel with my baby/toddler since I took this program is

|                       |       |                   |          |                      |          |                     |
|-----------------------|-------|-------------------|----------|----------------------|----------|---------------------|
| considerably<br>worse | worse | slightly<br>worse | the same | slightly<br>improved | improved | greatly<br>improved |
|-----------------------|-------|-------------------|----------|----------------------|----------|---------------------|

2. My baby/toddler's bonding with me using the methods presented in this program is

|                       |       |                   |          |                      |          |                     |
|-----------------------|-------|-------------------|----------|----------------------|----------|---------------------|
| considerably<br>worse | worse | slightly<br>worse | the same | slightly<br>improved | improved | greatly<br>improved |
|-----------------------|-------|-------------------|----------|----------------------|----------|---------------------|

3. My feelings about my baby/toddler's social, emotional and physical developmental progress are that I am

|                      |              |                          |         |                       |           |                      |
|----------------------|--------------|--------------------------|---------|-----------------------|-----------|----------------------|
| very<br>dissatisfied | dissatisfied | slightly<br>dissatisfied | neutral | slightly<br>satisfied | satisfied | greatly<br>satisfied |
|----------------------|--------------|--------------------------|---------|-----------------------|-----------|----------------------|

4. To what degree has the Incredible Years parenting program helped with other personal or family problems not directly related to your child (for example, your marriage, your feelings of support in general)?

|                                      |          |                      |                                   |                    |        |                     |
|--------------------------------------|----------|----------------------|-----------------------------------|--------------------|--------|---------------------|
| hindered<br>much more<br>than helped | hindered | hindered<br>slightly | neither<br>helped<br>nor hindered | helped<br>slightly | helped | helped<br>very much |
|--------------------------------------|----------|----------------------|-----------------------------------|--------------------|--------|---------------------|

5. My expectation for good results from the Incredible Years parent program is

|                     |             |                         |         |                        |            |                    |
|---------------------|-------------|-------------------------|---------|------------------------|------------|--------------------|
| very<br>pessimistic | pessimistic | slightly<br>pessimistic | neutral | slightly<br>optimistic | optimistic | very<br>optimistic |
|---------------------|-------------|-------------------------|---------|------------------------|------------|--------------------|

6. I feel that the approach used to enhance my baby's/toddler's development in this program is

|                       |               |                           |         |                         |             |                        |
|-----------------------|---------------|---------------------------|---------|-------------------------|-------------|------------------------|
| very<br>inappropriate | inappropriate | slightly<br>inappropriate | neutral | slightly<br>appropriate | appropriate | greatly<br>appropriate |
|-----------------------|---------------|---------------------------|---------|-------------------------|-------------|------------------------|

7. Would you recommend the program to a friend or relative?

strongly not recommend    not recommend    slightly not recommend    neutral    slightly recommend    recommend    strongly recommend

8. How confident are you in parenting at this time?

very unconfident    unconfident    slightly unconfident    neutral    slightly confident    confident    very confident

9. How confident are you in your ability to manage *future* behavior problems in the home using what you learned from this program?

very unconfident    unconfident    slightly unconfident    neutral    slightly confident    confident    very confident

10. My overall feeling about achieving my goals in this program for my child and family are

very negative    negative    slightly negative    neutral    slightly positive    positive    very positive

## ***B. Teaching Format***

### ***Usefulness***

In this section, we would like you to indicate how useful each of the following types of teaching is for you *now*. Please circle the response that most clearly describes your opinion.

1. Content of information presented was

extremely useless    useless    slightly useless    neutral    somewhat useful    useful    extremely useful

2. Demonstration of parenting skills through the use of video vignettes was

extremely useless    useless    slightly useless    neutral    somewhat useful    useful    extremely useful

3. Group discussion of parenting skills was

extremely useless    useless    slightly useless    neutral    somewhat useful    useful    extremely useful

4. Use of practice/role play during group sessions was

extremely useless    useless    slightly useless    neutral    somewhat useful    useful    extremely useful

5. I found the “buddy calls” to be

|                      |         |                     |         |                    |        |                     |
|----------------------|---------|---------------------|---------|--------------------|--------|---------------------|
| extremely<br>useless | useless | slightly<br>useless | neutral | somewhat<br>useful | useful | extremely<br>useful |
|----------------------|---------|---------------------|---------|--------------------|--------|---------------------|

6. Reading chapters from the Incredible Years book or listening to the CD was

|                      |         |                     |         |                    |        |                     |
|----------------------|---------|---------------------|---------|--------------------|--------|---------------------|
| extremely<br>useless | useless | slightly<br>useless | neutral | somewhat<br>useful | useful | extremely<br>useful |
|----------------------|---------|---------------------|---------|--------------------|--------|---------------------|

7. Practicing skills at home with my child was

|                      |         |                     |         |                    |        |                     |
|----------------------|---------|---------------------|---------|--------------------|--------|---------------------|
| extremely<br>useless | useless | slightly<br>useless | neutral | somewhat<br>useful | useful | extremely<br>useful |
|----------------------|---------|---------------------|---------|--------------------|--------|---------------------|

8. Weekly handouts (e.g., refrigerator notes) were

|                      |         |                     |         |                    |        |                     |
|----------------------|---------|---------------------|---------|--------------------|--------|---------------------|
| extremely<br>useless | useless | slightly<br>useless | neutral | somewhat<br>useful | useful | extremely<br>useful |
|----------------------|---------|---------------------|---------|--------------------|--------|---------------------|

9. Phone calls from the group leaders were

|                      |         |                     |         |                    |        |                     |
|----------------------|---------|---------------------|---------|--------------------|--------|---------------------|
| extremely<br>useless | useless | slightly<br>useless | neutral | somewhat<br>useful | useful | extremely<br>useful |
|----------------------|---------|---------------------|---------|--------------------|--------|---------------------|

### ***C. Specific Parenting Techniques***

#### ***Usefulness***

In this section, we would like you to indicate how useful each of the following techniques is in improving your interactions with your child and decreasing his or her “inappropriate” behaviors *now*. Please circle the response that most accurately describes the usefulness of the content or skills.

1. Information about infant/toddler development and developmental milestones

|                      |         |                     |         |                    |        |                     |
|----------------------|---------|---------------------|---------|--------------------|--------|---------------------|
| extremely<br>useless | useless | slightly<br>useless | neutral | somewhat<br>useful | useful | extremely<br>useful |
|----------------------|---------|---------------------|---------|--------------------|--------|---------------------|

2. Providing Physical, Tactile and Visual Stimulation

|                      |         |                     |         |                    |        |                     |
|----------------------|---------|---------------------|---------|--------------------|--------|---------------------|
| extremely<br>useless | useless | slightly<br>useless | neutral | somewhat<br>useful | useful | extremely<br>useful |
|----------------------|---------|---------------------|---------|--------------------|--------|---------------------|

3. Promoting Infant and Toddler Language Development

|                      |         |                     |         |                    |        |                     |
|----------------------|---------|---------------------|---------|--------------------|--------|---------------------|
| extremely<br>useless | useless | slightly<br>useless | neutral | somewhat<br>useful | useful | extremely<br>useful |
|----------------------|---------|---------------------|---------|--------------------|--------|---------------------|

#### 4. Child-Directed Play

|                      |         |                     |         |                    |        |                     |
|----------------------|---------|---------------------|---------|--------------------|--------|---------------------|
| extremely<br>useless | useless | slightly<br>useless | neutral | somewhat<br>useful | useful | extremely<br>useful |
|----------------------|---------|---------------------|---------|--------------------|--------|---------------------|

#### 5. Descriptive Commenting/Social, Emotion and Academic Coaching

|                      |         |                     |         |                    |        |                     |
|----------------------|---------|---------------------|---------|--------------------|--------|---------------------|
| extremely<br>useless | useless | slightly<br>useless | neutral | somewhat<br>useful | useful | extremely<br>useful |
|----------------------|---------|---------------------|---------|--------------------|--------|---------------------|

#### 6. Praise and Encouragement

|                      |         |                     |         |                    |        |                     |
|----------------------|---------|---------------------|---------|--------------------|--------|---------------------|
| extremely<br>useless | useless | slightly<br>useless | neutral | somewhat<br>useful | useful | extremely<br>useful |
|----------------------|---------|---------------------|---------|--------------------|--------|---------------------|

#### 7. Spontaneous Rewards

|                      |         |                     |         |                    |        |                     |
|----------------------|---------|---------------------|---------|--------------------|--------|---------------------|
| extremely<br>useless | useless | slightly<br>useless | neutral | somewhat<br>useful | useful | extremely<br>useful |
|----------------------|---------|---------------------|---------|--------------------|--------|---------------------|

#### 8. Routines, Separation & Reunions

|                      |         |                     |         |                    |        |                     |
|----------------------|---------|---------------------|---------|--------------------|--------|---------------------|
| extremely<br>useless | useless | slightly<br>useless | neutral | somewhat<br>useful | useful | extremely<br>useful |
|----------------------|---------|---------------------|---------|--------------------|--------|---------------------|

#### 9. Ignoring

|                      |         |                     |         |                    |        |                     |
|----------------------|---------|---------------------|---------|--------------------|--------|---------------------|
| extremely<br>useless | useless | slightly<br>useless | neutral | somewhat<br>useful | useful | extremely<br>useful |
|----------------------|---------|---------------------|---------|--------------------|--------|---------------------|

#### 10. Positive Discipline

|                      |         |                     |         |                    |        |                     |
|----------------------|---------|---------------------|---------|--------------------|--------|---------------------|
| extremely<br>useless | useless | slightly<br>useless | neutral | somewhat<br>useful | useful | extremely<br>useful |
|----------------------|---------|---------------------|---------|--------------------|--------|---------------------|

#### 11. Information about baby- and toddler-proofing at home

|                      |         |                     |         |                    |        |                     |
|----------------------|---------|---------------------|---------|--------------------|--------|---------------------|
| extremely<br>useless | useless | slightly<br>useless | neutral | somewhat<br>useful | useful | extremely<br>useful |
|----------------------|---------|---------------------|---------|--------------------|--------|---------------------|

#### 12. This Overall Group of Techniques

|                      |         |                     |         |                    |        |                     |
|----------------------|---------|---------------------|---------|--------------------|--------|---------------------|
| extremely<br>useless | useless | slightly<br>useless | neutral | somewhat<br>useful | useful | extremely<br>useful |
|----------------------|---------|---------------------|---------|--------------------|--------|---------------------|

## ***D. Evaluation of Parent Group Leader(s)***

In this section we would like you to express your opinions about your group leader(s). Please circle the response to each question that best describes how you feel.

Group Leader #1 \_\_\_\_\_

(name)

1. I feel that the group leader's teaching was

|              |      |                  |         |                  |          |           |
|--------------|------|------------------|---------|------------------|----------|-----------|
| very<br>poor | poor | below<br>average | average | above<br>average | superior | excellent |
|--------------|------|------------------|---------|------------------|----------|-----------|

2. The group leader's preparation was

|              |      |                  |         |                  |          |           |
|--------------|------|------------------|---------|------------------|----------|-----------|
| very<br>poor | poor | below<br>average | average | above<br>average | superior | excellent |
|--------------|------|------------------|---------|------------------|----------|-----------|

3. Concerning the group leader's interest and concern in me and my child, I was

|                      |              |                          |         |                       |           |                        |
|----------------------|--------------|--------------------------|---------|-----------------------|-----------|------------------------|
| very<br>dissatisfied | dissatisfied | slightly<br>dissatisfied | average | slightly<br>satisfied | satisfied | extremely<br>satisfied |
|----------------------|--------------|--------------------------|---------|-----------------------|-----------|------------------------|

4. At this point, I feel that the group leader in the program was

|                        |           |                       |         |                     |         |                      |
|------------------------|-----------|-----------------------|---------|---------------------|---------|----------------------|
| extremely<br>unhelpful | unhelpful | slightly<br>unhelpful | neutral | slightly<br>helpful | helpful | extremely<br>helpful |
|------------------------|-----------|-----------------------|---------|---------------------|---------|----------------------|

5. Concerning my personal feelings toward the group leader, I

|                                 |                    |                                |                                              |                             |                 |                              |
|---------------------------------|--------------------|--------------------------------|----------------------------------------------|-----------------------------|-----------------|------------------------------|
| dislike<br>him/her<br>very much | dislike<br>him/her | dislike<br>him/her<br>slightly | have a<br>neutral attitude<br>toward him/her | like<br>him/her<br>slightly | like<br>him/her | like<br>him/her<br>very much |
|---------------------------------|--------------------|--------------------------------|----------------------------------------------|-----------------------------|-----------------|------------------------------|

If more than one group leader was involved in your program, please fill in the following. (Go to Section E if only one leader was involved.)

Group Leader #2 \_\_\_\_\_

(name)

1. I feel that the group leader's teaching was

|              |      |                  |         |                  |          |           |
|--------------|------|------------------|---------|------------------|----------|-----------|
| very<br>poor | poor | below<br>average | average | above<br>average | superior | excellent |
|--------------|------|------------------|---------|------------------|----------|-----------|

2. The group leader's preparation was

|              |      |                  |         |                  |          |           |
|--------------|------|------------------|---------|------------------|----------|-----------|
| very<br>poor | poor | below<br>average | average | above<br>average | superior | excellent |
|--------------|------|------------------|---------|------------------|----------|-----------|

3. Concerning the group leader's interest and concern in me and my child, I was

|                      |              |                          |         |                       |           |                        |
|----------------------|--------------|--------------------------|---------|-----------------------|-----------|------------------------|
| very<br>dissatisfied | dissatisfied | slightly<br>dissatisfied | average | slightly<br>satisfied | satisfied | extremely<br>satisfied |
|----------------------|--------------|--------------------------|---------|-----------------------|-----------|------------------------|

4. At this point, I feel that the group leader in the program was

|                        |           |                       |         |                     |         |                      |
|------------------------|-----------|-----------------------|---------|---------------------|---------|----------------------|
| extremely<br>unhelpful | unhelpful | slightly<br>unhelpful | neutral | slightly<br>helpful | helpful | extremely<br>helpful |
|------------------------|-----------|-----------------------|---------|---------------------|---------|----------------------|

5. Concerning my personal feelings toward the group leader, I

dislike  
him/her  
very much

dislike  
him/her

dislike  
him/her  
slightly

have a  
neutral attitude  
toward him/her

like  
him/her  
slightly

like  
him/her

like  
him/her  
very much

### ***E. Overall Program Evaluation***

1. What part of the program was most helpful to you?

2. What did you like most about the program?

3. What did you like least about the program?

4. How could the program have been improved to help you more?
