# Supplementary material for: Understanding the implementation and effectiveness of a group-based early parenting intervention: a process evaluation protocol
Source: Springer Nature journal article supplement (doi:10.1186/s12913-016-1737-3), 2016-09-15
Supplement: MOESM2 [file 10708094]

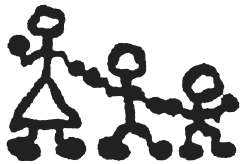

**Incredible Years®**  
**Parent Program Satisfaction Questionnaire**  
**Babies Program**

(Hand out at end of the program)

Participant's Name \_\_\_\_\_ Date \_\_\_\_\_

The following questionnaire is part of our evaluation of the Incredible Years parenting program that you have received. It is important that you answer as honestly as possible. The information obtained will help us to evaluate and continually improve the program we offer. Your cooperation is greatly appreciated. All responses will be strictly confidential.

**A. The Overall Program**

Please circle the response that best expresses how you honestly feel at this point.

1. The bonding that I feel with my baby since I took this program is

|                       |       |                   |          |                      |          |                     |
|-----------------------|-------|-------------------|----------|----------------------|----------|---------------------|
| considerably<br>worse | worse | slightly<br>worse | the same | slightly<br>improved | improved | greatly<br>improved |
|-----------------------|-------|-------------------|----------|----------------------|----------|---------------------|

2. My baby's bonding with me since I started this program is

|                       |       |                   |          |                      |          |                     |
|-----------------------|-------|-------------------|----------|----------------------|----------|---------------------|
| considerably<br>worse | worse | slightly<br>worse | the same | slightly<br>improved | improved | greatly<br>improved |
|-----------------------|-------|-------------------|----------|----------------------|----------|---------------------|

3. My feelings about my baby's social, emotional and physical developmental progress are that I am

|                      |              |                          |         |                       |           |                      |
|----------------------|--------------|--------------------------|---------|-----------------------|-----------|----------------------|
| very<br>dissatisfied | dissatisfied | slightly<br>dissatisfied | neutral | slightly<br>satisfied | satisfied | greatly<br>satisfied |
|----------------------|--------------|--------------------------|---------|-----------------------|-----------|----------------------|

4. To what degree has the Incredible Years parenting program helped with other personal or family problems not directly related to your baby (for example, your feelings of support in general)?

|                                      |          |                      |                                   |                    |        |                     |
|--------------------------------------|----------|----------------------|-----------------------------------|--------------------|--------|---------------------|
| hindered<br>much more<br>than helped | hindered | hindered<br>slightly | neither<br>helped<br>nor hindered | helped<br>slightly | helped | helped<br>very much |
|--------------------------------------|----------|----------------------|-----------------------------------|--------------------|--------|---------------------|

5. My expectation for good results from the Incredible Years baby program is

|                     |             |                         |         |                        |            |                    |
|---------------------|-------------|-------------------------|---------|------------------------|------------|--------------------|
| very<br>pessimistic | pessimistic | slightly<br>pessimistic | neutral | slightly<br>optimistic | optimistic | very<br>optimistic |
|---------------------|-------------|-------------------------|---------|------------------------|------------|--------------------|

6. I feel that the approaches used to enhance my baby's development and language in this program are

|                       |               |                           |         |                         |             |                        |
|-----------------------|---------------|---------------------------|---------|-------------------------|-------------|------------------------|
| very<br>inappropriate | inappropriate | slightly<br>inappropriate | neutral | slightly<br>appropriate | appropriate | greatly<br>appropriate |
|-----------------------|---------------|---------------------------|---------|-------------------------|-------------|------------------------|

7. Would you recommend the Incredible Years program to a friend or relative with a baby?

strongly not recommend    not recommend    slightly not recommend    neutral    slightly recommend    recommend    strongly recommend

8. How confident are you in parenting your baby at this time?

very unconfident    unconfident    slightly unconfident    neutral    slightly confident    confident    very confident

9. How confident are you in your ability to provide physical, tactile and visual stimulation at this time?

very unconfident    unconfident    slightly unconfident    neutral    slightly confident    confident    very confident

10. My overall feeling about achieving my goals in this program for my baby are

very negative    negative    slightly negative    neutral    slightly positive    positive    very positive

## ***B. Incredible Years Teaching Format/Methods***

### ***Usefulness***

In this section, we would like you to indicate how useful each of the following types of methods used to deliver this program is for you *now*. Please circle the response that most clearly describes your opinion.

1. Content of information presented was

extremely useless    useless    slightly useless    neutral    somewhat useful    useful    extremely useful

2. Demonstration of parenting skills through the use of video vignettes was

extremely useless    useless    slightly useless    neutral    somewhat useful    useful    extremely useful

3. Group discussion, sharing and support from other parents during this program was

extremely useless    useless    slightly useless    neutral    somewhat useful    useful    extremely useful

4. Use of practice with my baby during group sessions was

extremely useless    useless    slightly useless    neutral    somewhat useful    useful    extremely useful

5. I found the “buddy calls” to be

extremely      useless      slightly      neutral      somewhat      useful      extremely  
useless                      useless                      useful                      useful                      useful

6. The “baby-proof safety checklist” and “things I can do” journal was

extremely      useless      slightly      neutral      somewhat      useful      extremely  
useless                      useless                      useful                      useful                      useful

7. Practicing things I learned at home with my baby was

extremely      useless      slightly      neutral      somewhat      useful      extremely  
useless                      useless                      useful                      useful                      useful

8. Weekly handouts (e.g., refrigerator notes) were

extremely      useless      slightly      neutral      somewhat      useful      extremely  
useless                      useless                      useful                      useful                      useful

9. Phone calls from the group leaders were

extremely      useless      slightly      neutral      somewhat      useful      extremely  
useless                      useless                      useful                      useful                      useful

### ***C. Specific Parenting Techniques/Topics***

#### ***Usefulness***

In this section, we would like you to indicate how useful each of the following topics and techniques is in improving your interactions with your baby. Please circle the response that most accurately describes the usefulness of the content or techniques.

1. Information about baby’s development and developmental milestones

extremely      useless      slightly      neutral      somewhat      useful      extremely  
useless                      useless                      useful                      useful                      useful

2. Providing Physical, Tactile and Visual Stimulation (e.g., baby massage, games, exercises)

extremely      useless      slightly      neutral      somewhat      useful      extremely  
useless                      useless                      useful                      useful                      useful

3. Promoting Baby Language and Brain Development (e.g, speaking “parent-ese”)

extremely      useless      slightly      neutral      somewhat      useful      extremely  
useless                      useless                      useful                      useful                      useful

#### 4. Child-Directed Play Interactions (e.g., reading babies' cues)

|                      |         |                     |         |                    |        |                     |
|----------------------|---------|---------------------|---------|--------------------|--------|---------------------|
| extremely<br>useless | useless | slightly<br>useless | neutral | somewhat<br>useful | useful | extremely<br>useful |
|----------------------|---------|---------------------|---------|--------------------|--------|---------------------|

#### 5. Descriptive Commenting/Social and Emotion Coaching

|                      |         |                     |         |                    |        |                     |
|----------------------|---------|---------------------|---------|--------------------|--------|---------------------|
| extremely<br>useless | useless | slightly<br>useless | neutral | somewhat<br>useful | useful | extremely<br>useful |
|----------------------|---------|---------------------|---------|--------------------|--------|---------------------|

#### 6. Helping Babies Feel Loved, Safe and Secure

|                      |         |                     |         |                    |        |                     |
|----------------------|---------|---------------------|---------|--------------------|--------|---------------------|
| extremely<br>useless | useless | slightly<br>useless | neutral | somewhat<br>useful | useful | extremely<br>useful |
|----------------------|---------|---------------------|---------|--------------------|--------|---------------------|

#### 7. Singing to Babies

|                      |         |                     |         |                    |        |                     |
|----------------------|---------|---------------------|---------|--------------------|--------|---------------------|
| extremely<br>useless | useless | slightly<br>useless | neutral | somewhat<br>useful | useful | extremely<br>useful |
|----------------------|---------|---------------------|---------|--------------------|--------|---------------------|

#### 8. Flexibility in Routines and Transition to Predictable Daily Schedules

|                      |         |                     |         |                    |        |                     |
|----------------------|---------|---------------------|---------|--------------------|--------|---------------------|
| extremely<br>useless | useless | slightly<br>useless | neutral | somewhat<br>useful | useful | extremely<br>useful |
|----------------------|---------|---------------------|---------|--------------------|--------|---------------------|

#### 9. Gaining Support and Importance of Parental Self-Care

|                      |         |                     |         |                    |        |                     |
|----------------------|---------|---------------------|---------|--------------------|--------|---------------------|
| extremely<br>useless | useless | slightly<br>useless | neutral | somewhat<br>useful | useful | extremely<br>useful |
|----------------------|---------|---------------------|---------|--------------------|--------|---------------------|

#### 10. Knowing How to Respond to a Baby's Crying & Strategies for Staying Calm

|                      |         |                     |         |                    |        |                     |
|----------------------|---------|---------------------|---------|--------------------|--------|---------------------|
| extremely<br>useless | useless | slightly<br>useless | neutral | somewhat<br>useful | useful | extremely<br>useful |
|----------------------|---------|---------------------|---------|--------------------|--------|---------------------|

#### 11. Introducing Books to Babies

|                      |         |                     |         |                    |        |                     |
|----------------------|---------|---------------------|---------|--------------------|--------|---------------------|
| extremely<br>useless | useless | slightly<br>useless | neutral | somewhat<br>useful | useful | extremely<br>useful |
|----------------------|---------|---------------------|---------|--------------------|--------|---------------------|

#### 12. Assuring a Baby-proofed Home

|                      |         |                     |         |                    |        |                     |
|----------------------|---------|---------------------|---------|--------------------|--------|---------------------|
| extremely<br>useless | useless | slightly<br>useless | neutral | somewhat<br>useful | useful | extremely<br>useful |
|----------------------|---------|---------------------|---------|--------------------|--------|---------------------|

#### 13. This Overall Group of Techniques

|                      |         |                     |         |                    |        |                     |
|----------------------|---------|---------------------|---------|--------------------|--------|---------------------|
| extremely<br>useless | useless | slightly<br>useless | neutral | somewhat<br>useful | useful | extremely<br>useful |
|----------------------|---------|---------------------|---------|--------------------|--------|---------------------|

### **D. Evaluation of Incredible Years Parent Group Leader(s)**

In this section we would like you to express your opinions about your group leader(s). Please circle the response to each question that best describes how you feel.

Group Leader #1 \_\_\_\_\_

(name)

1. I feel that the group leader's teaching and facilitation of group discussions was

|              |      |                  |         |                  |          |           |
|--------------|------|------------------|---------|------------------|----------|-----------|
| very<br>poor | poor | below<br>average | average | above<br>average | superior | excellent |
|--------------|------|------------------|---------|------------------|----------|-----------|

2. The group leader's preparation was

|              |      |                  |         |                  |          |           |
|--------------|------|------------------|---------|------------------|----------|-----------|
| very<br>poor | poor | below<br>average | average | above<br>average | superior | excellent |
|--------------|------|------------------|---------|------------------|----------|-----------|

3. Concerning the group leader's interest and concern in me and my baby, I was

|                      |              |                          |         |                       |           |                        |
|----------------------|--------------|--------------------------|---------|-----------------------|-----------|------------------------|
| very<br>dissatisfied | dissatisfied | slightly<br>dissatisfied | average | slightly<br>satisfied | satisfied | extremely<br>satisfied |
|----------------------|--------------|--------------------------|---------|-----------------------|-----------|------------------------|

4. At this point, I feel that the group leader in the program was

|                        |           |                       |         |                     |         |                      |
|------------------------|-----------|-----------------------|---------|---------------------|---------|----------------------|
| extremely<br>unhelpful | unhelpful | slightly<br>unhelpful | neutral | slightly<br>helpful | helpful | extremely<br>helpful |
|------------------------|-----------|-----------------------|---------|---------------------|---------|----------------------|

If more than one group leader was involved in your program, please fill in the following. (Go to Section E if only one leader was involved.)

Group Leader #2 \_\_\_\_\_

(name)

1. I feel that the group leader's teaching and facilitation of group discussion was

|              |      |                  |         |                  |          |           |
|--------------|------|------------------|---------|------------------|----------|-----------|
| very<br>poor | poor | below<br>average | average | above<br>average | superior | excellent |
|--------------|------|------------------|---------|------------------|----------|-----------|

2. The group leader's preparation was

|              |      |                  |         |                  |          |           |
|--------------|------|------------------|---------|------------------|----------|-----------|
| very<br>poor | poor | below<br>average | average | above<br>average | superior | excellent |
|--------------|------|------------------|---------|------------------|----------|-----------|

3. Concerning the group leader's interest and concern in me and my baby, I was

|                      |              |                          |         |                       |           |                        |
|----------------------|--------------|--------------------------|---------|-----------------------|-----------|------------------------|
| very<br>dissatisfied | dissatisfied | slightly<br>dissatisfied | average | slightly<br>satisfied | satisfied | extremely<br>satisfied |
|----------------------|--------------|--------------------------|---------|-----------------------|-----------|------------------------|

4. At this point, I feel that the group leader in the program was

|                        |           |                       |         |                     |         |                      |
|------------------------|-----------|-----------------------|---------|---------------------|---------|----------------------|
| extremely<br>unhelpful | unhelpful | slightly<br>unhelpful | neutral | slightly<br>helpful | helpful | extremely<br>helpful |
|------------------------|-----------|-----------------------|---------|---------------------|---------|----------------------|

## ***E. Overall Program Evaluation***

1. What part of the program was most helpful to you?

2. What did you like most about the program?

3. What did you like least about the program?

4. How could the program have been improved to help you more?
